# Supplementary material
Source: PubMed Central journal article supplement (PMC3434740)
Supplement: supp_194.13.3377_TableS1.pdf [file supp_194.13.3377_TableS1.pdf]

**Table SI 1.** List of the primers and amplicon sizes in real-time PCR analysis

| Gene                         | Primers name | Primers sequences (5'-3') | Amplicon size (bp) |
|------------------------------|--------------|---------------------------|--------------------|
| <b>Metabolic pathway</b>     |              |                           |                    |
| <i>eda</i>                   | edaF         | GATGTCGCCCACGCACTG        | 186                |
|                              | edaR         | CGCCGCAATCGCTTCAT         |                    |
| <i>edd</i>                   | eddF         | AAAAAGCCGGATTCAAAGTCG     | 151                |
|                              | eddR         | CAATCCAAGCGCAGCAAATC      |                    |
| <i>gnd</i>                   | gndF         | TGGCGTGGTGGTTGTATC        | 168                |
|                              | gndR         | GCCGACTTCCAGCGACTT        |                    |
| <i>tka</i>                   | tkaF         | CGCCTACGCAAAAACTCA        | 156                |
|                              | tkaR         | CTGCGCTCGGTGTCGTA         |                    |
| <i>pfk</i>                   | pfkF         | CACTTGGCGCAGGTTTAG        | 174                |
|                              | pfkR         | CTTTTCGCGCACTTCAA         |                    |
| <i>fba</i>                   | fbaF         | TGTGGACGCTGGGATTAT        | 152                |
|                              | fbaR         | GCGCCGCGTTTATGAC          |                    |
| <i>aceB</i>                  | aceBF        | CTCGGCATTCCAGACG          | 180                |
|                              | aceBR        | AATCGCATCACGCAGGTT        |                    |
| <i>aceA</i>                  | aceAF        | CGTACGCCGCATCAATAA        | 180                |
|                              | aceAR        | GCGCCCCGTTCAATCA          |                    |
| <b>Glycogen synthesis</b>    |              |                           |                    |
| <i>glgA</i>                  | glgAF        | TGCGCTGCCTGCTTATCG        | 165                |
|                              | glgAR        | GCCGGGCGGTCAAAAT          |                    |
| <b>Virulence</b>             |              |                           |                    |
| <i>ctxA</i>                  | ctxAF        | TTGTTAGGCACGATGATG        | 163                |
|                              | ctxAR        | GGACTGTATGCCCTAAT         |                    |
| <i>hapA</i>                  | hapAF        | GCCAGATTTAACGAAAG         | 192                |
|                              | hapAR        | CTAGCTTACAATGCAAG         |                    |
| <i>hlyA</i>                  | hlyAF        | CTGCGCACCTTGATGTTG        | 171                |
|                              | hlyAR        | GTTGCGCACGGGAGAA          |                    |
| <i>ompU</i>                  | ompUF        | AACAAACGCTGCCAAGTA        | 178                |
|                              | ompUR        | GAACAGTCCTGCGAAGTA        |                    |
| <i>ompT</i>                  | ompTF        | GGAACCGGACAAGGAAT         | 157                |
|                              | ompTR        | CGTAGCTGACCGTAAAA         |                    |
| <b>Colonization</b>          |              |                           |                    |
| <i>tcpA</i>                  | tcpAF        | TGCAATTATTAACAGC          | 159                |
|                              | tcpAR        | CAATCGCACGCTGAGC          |                    |
| <i>mshA</i>                  | mshAF        | GCGTTGCAATCGTCTACA        | 151                |
|                              | mshAR        | TTCCAGCAACCCCAGTCT        |                    |
| <i>acf</i>                   | acfF         | AAGCCTGGTATCGGAATC        | 177                |
|                              | acfR         | ATCAACAAACGCCTTACG        |                    |
| <b>Pathogenic regulation</b> |              |                           |                    |
| <i>tcpP</i>                  | tcpPF        | GTATGTCCGCGTGATTTA        | 167                |
|                              | tcpPR        | AGGGGGCAGGATGATA          |                    |
| <i>tcpH</i>                  | tcpHF        | GGGCGCTACAGGTCTATT        | 171                |
|                              | tcpHR        | CCTTGTGGATCGGTCTGG        |                    |
| <i>toxT</i>                  | toxTF        | TGGTGAATTAAGAACGAA        | 166                |
|                              | toxTR        | GCTAGCAAACCCAGACT         |                    |
| <i>toxR</i>                  | toxRF        | CTTCCCCTCGCAGTATTA        | 177                |
|                              | toxRR        | CTTGAGCCCACCAGTATG        |                    |
| <i>toxS</i>                  | toxSF        | ATCTCCGAATTTGGTGAA        | 160                |
|                              | toxSR        | CTCGACGACTTTGTTGTG        |                    |
| <i>aphA</i>                  | aphAF        | AGCGCTTTAGGTGAGTGG        | 177                |
|                              | aphAR        | AGCGGCTTCGATTTCTG         |                    |
| <i>aphB</i>                  | aphBF        | TCATCCGCAACCGACTCA        | 160                |
|                              | aphBR        | TGCGCTGCGAACAACATT        |                    |
| <i>hns</i>                   | hnsF         | TTGAAGAAGCGTTAGATA        | 176                |
|                              | hnsR         | TTAGTTTCGCCTGATAG         |                    |

**Biofilm regulation**

|             |              |                    |     |
|-------------|--------------|--------------------|-----|
| <i>cya</i>  | <i>cyaF</i>  | AACGCCAGCTGACAATCC | 174 |
|             | <i>cyaR</i>  | TTCGCCCAATCGGTAATG |     |
| <i>crp</i>  | <i>crpF</i>  | TTGCACGTCAGCCAGATG | 180 |
|             | <i>crpR</i>  | AGCGAGTGCCGTAACCA  |     |
| <i>cdg</i>  | <i>cdgF</i>  | AGGCGCAGGTGGAGTC   | 170 |
|             | <i>cdgR</i>  | ACCGGGAGGCAACAAC   |     |
| <i>chiA</i> | <i>chiAF</i> | ACGGCGGCTGGAATAACG | 163 |
|             | <i>chiAR</i> | CCTTGGGCGAGCAGCAGT |     |
| <i>wecB</i> | <i>wecBF</i> | AGCCTGGGCAAACACTCA | 178 |
|             | <i>wecBR</i> | CTCAAACCCGCTTCAACA |     |
| <i>hapR</i> | <i>hapRF</i> | TGCGAAAGAGGTCATCA  | 170 |
|             | <i>hapRR</i> | CTTGGGCCAGTTTACG   |     |

**Flagella**

|             |              |                    |     |
|-------------|--------------|--------------------|-----|
| <i>flaC</i> | <i>flaCF</i> | GCGAAAGAAGGGGATGAT | 178 |
|             | <i>flaCR</i> | GCGCAGCACCGATAACC  |     |
| <i>fliI</i> | <i>fliIF</i> | TCTTCCGCCAGTGT     | 174 |
|             | <i>fliIR</i> | ATCGCGGAACCCAGTC   |     |

**Iron transport**

|             |              |                    |     |
|-------------|--------------|--------------------|-----|
| <i>fbpB</i> | <i>fbpBF</i> | GTGGGGATCCGCTCTGGT | 169 |
|             | <i>fbpBR</i> | TCATCGCCCGCACAAAAC |     |

**Chemotaxis**

|             |              |                    |     |
|-------------|--------------|--------------------|-----|
| <i>cheR</i> | <i>cheRF</i> | CTGCCGATTCCGTGATTA | 159 |
|             | <i>cheRR</i> | TCTCCGCTGGCTTGAAA  |     |
| <i>cheB</i> | <i>cheBF</i> | TCTGCGGTCGATTACAAG | 166 |
|             | <i>cheBR</i> | ATCGCAAGCTGGTGGTCT |     |

**Bile resistance**

|             |              |                    |     |
|-------------|--------------|--------------------|-----|
| <i>bile</i> | <i>bileF</i> | GACGTGAACGGCGACTCT | 179 |
|             | <i>bileR</i> | TCTGCGGCATTGATTGTG |     |

**Biotin synthesis**

|             |              |                    |     |
|-------------|--------------|--------------------|-----|
| <i>bioB</i> | <i>bioBF</i> | GCGGGGCTGGATTATTAC | 178 |
|             | <i>bioBR</i> | CAGCGCGGTCATTGGT   |     |

**In vivo inducible genes**

|              |               |                    |     |
|--------------|---------------|--------------------|-----|
| <i>tprG</i>  | <i>tprGF</i>  | TGCTGCAACGCCTGAAAG | 180 |
|              | <i>tprGR</i>  | CGATCGCCAACGGTGAAG |     |
| <i>acnA</i>  | <i>acnAF</i>  | GCGGGAGCGGATTATGG  | 173 |
|              | <i>acnAR</i>  | AGCGAGTGGCGATTGACG |     |
| <i>gltB1</i> | <i>gltB1F</i> | GTGGCGGTCAGGGTTGTG | 173 |
|              | <i>gltB1R</i> | TTGGGCGCGTTTATGTTC |     |
| <i>actP</i>  | <i>actPF</i>  | GCGGGTCTGCTACTGGTT | 158 |
|              | <i>actPR</i>  | CCCGGAGGATTGATGC   |     |
| <i>cadA</i>  | <i>cadAF</i>  | TGGCGCAAGGCATTAC   | 167 |
|              | <i>cadAR</i>  | CACGCGACCCACCATCTC |     |

**Real-time PCR internal control**

|             |              |                    |     |
|-------------|--------------|--------------------|-----|
| <i>recA</i> | <i>recAF</i> | AAGCAATGCGTAAACTGA | 162 |
|             | <i>recAR</i> | GGCGAATATCCAAACGAA |     |

---

**Table SI 2.** Selected gene expression profiles of *V. cholerae* strain N16961 grown in M9-Gnt as compared to M9-Glu grown cells and their comparison to microarray analysis of *V. cholerae* genes differentially expressed in rabbit ileal loop as available in GSE24405-07. Real-time PCR based comparative analysis on certain genes have been included.

| ORF                                                      | Gene        | Gene ID# | Gnt<br>microarray† | Expression<br>significance<br>in Gnt<br>grown<br>cells‡ | Expression<br>significance<br>in 4h/ 12h<br>in mucus | Real<br>Time<br>PCR± |
|----------------------------------------------------------|-------------|----------|--------------------|---------------------------------------------------------|------------------------------------------------------|----------------------|
| <b>Metabolic pathway</b>                                 |             |          |                    |                                                         |                                                      |                      |
| 2-keto-3-deoxy-6-phosphogluconate aldolase (EC 4.1.2.14) | <i>eda</i>  | VC0285   | 2.96               | +                                                       | 0/0                                                  | 16.87                |
| Gluconate permease                                       | <i>gntP</i> | VC0286   | 3.85               | +                                                       | +*/0                                                 | ND                   |
| Gluconate kinase (EC 2.7.1.12)                           | <i>gntK</i> | VC0287   | 2.81               | +                                                       | 0/0                                                  | ND                   |
| 6-phosphogluconate dehydratase (EC 4.2.1.12)             | <i>edd</i>  | VC0288   | 3.27               | +                                                       | +*/0                                                 | 31.76                |
| Gnt-I regulator                                          | <i>gntR</i> | VC0289   | 1.34               | +                                                       | 0/0                                                  | ND                   |
| Glucose-6-phosphate dehydrogenase (EC 1.1.1.49)          | <i>zwf</i>  | VCA0896  | -4.49              | -                                                       | 0/0                                                  | ND                   |
| 6-phosphogluconolactonase (EC 3.1.1.31)                  | <i>pgls</i> | VCA0897  | -5.09              | -                                                       | 0/-*                                                 | ND                   |
| 6-phosphogluconate dehydrogenase (EC 1.1.1.44)           | <i>gnd</i>  | VCA0898  | -3.55              | -                                                       | 0/-*                                                 | 0.25                 |
| Ribulose-5-phosphate epimerase (EC 5.1.3.1)              | <i>rpe</i>  | VC2625   | -0.42              | 0                                                       | -*/0                                                 | ND                   |
| Ribose-5-phosphate isomerase (EC 5.3.1.6)                | <i>rpiA</i> | VC2480   | -1.11              | -                                                       | -*/0                                                 | ND                   |
| Transaldolase (EC 2.2.1.2)                               | <i>tka</i>  | VCA0623  | -1.81              | -                                                       | -*/0                                                 | 0.60                 |
| Transketolase (EC 2.2.1.1)                               | <i>tkt</i>  | VCA0624  | -0.72              | -                                                       | 0/-*                                                 | ND                   |

|                                                  |             |         |       |    |      |        |
|--------------------------------------------------|-------------|---------|-------|----|------|--------|
| Glucose-6-phosphate isomerase (EC 5.3.1.9)       | <i>pgi</i>  | VC0374  | -0.58 | 0  | 0/-* | ND     |
| 6-phosphofructokinase (EC 2.7.1.11)              | <i>pfk</i>  | VC2689  | -0.48 | 0  | -*/0 | 0.05   |
| Fructose-1-6-bisphosphate aldolase (EC 4.1.2.13) | <i>fba</i>  | VC0478  | -1.75 | -* | 0/0  | 0.57   |
| Malate synthase (EC 2.3.3.9)                     | <i>aceB</i> | VC0734  | 4.50  | +  | 0/0  | 3.55   |
| Isocitrate lyase (EC 4.1.3.1)                    | <i>aceA</i> | VC0736  | 4.45  | +  | 0/+* | 2.80   |
| <b>Glycogen synthesis</b>                        |             |         |       |    |      |        |
| Glycogen synthase (EC 2.4.1.21)                  | <i>glgA</i> | VC1726  | 2.32  | +  | 0/+* | 9.45   |
| Glycogen operon protein                          | <i>glgX</i> | VCA1029 | 1.17  | +  | 0/0  | ND     |
| Glycogen branching enzyme (EC 2.4.1.18)          | <i>glgB</i> | VCA0016 | 0.40  | 0  | 0/+* | ND     |
| <b>Virulence</b>                                 |             |         |       |    |      |        |
| Cholera toxin subunit B                          | <i>ctxB</i> | VC1456  | 1.73  | +  | +*/0 | ND     |
| Cholera toxin subunit A (EC 2.4.2.36)            | <i>ctxA</i> | VC1457  | 0.23  | 0  | +*/0 | 58.03  |
| Zonula occludens toxin                           | <i>zot</i>  | VC1458  | 0.34  | 0  | 0/0  | ND     |
| Accessory cholera enterotoxin                    | <i>ace</i>  | VC1459  | 0.74  | +  | 0/0  | ND     |
| Repetitive toxin transporter                     | <i>rtxA</i> | VC1448  | 1.15  | +  | 0/0  | ND     |
| Haemagglutinin protease                          | <i>hapA</i> | VCA0446 | -5.98 | -* | 0/0  | 0.49   |
| Haemolysin                                       | <i>hlyA</i> | VC0489  | 0.06  | 0  | 0/0  | 0.14   |
| Outer membrane protein U                         | <i>ompU</i> | VC0633  | -3.91 | -* | 0/0  | 0.86   |
| Outer membrane protein T                         | <i>ompT</i> | VC1854  | 3.21  | +  | 0/+* | 10.52  |
| <b>Colonization</b>                              |             |         |       |    |      |        |
| Toxin coregulated pilus                          | <i>tcpA</i> | VC0828  | 1.47  | +  | +*/0 | 472.06 |

|                                                      |             |        |       |    |      |       |
|------------------------------------------------------|-------------|--------|-------|----|------|-------|
| Mannose sensitive haemagglutinin pilin subunit B     | <i>mshB</i> | VC0408 | 2.44  | +* | 0/+* | ND    |
| Mannose sensitive haemagglutinin pilin subunit A     | <i>mshA</i> | VC0409 | 0.65  | +* | 0/0  | 1.80  |
| Mannose sensitive haemagglutinin pilin subunit C     | <i>mshC</i> | VC0410 | 2.63  | +* | 0/0  | ND    |
| Mannose sensitive haemagglutinin pilin subunit D     | <i>mshD</i> | VC0411 | 3.15  | +* | 0/+* | ND    |
| Accessory colonizing factor                          | <i>acf</i>  | VC0841 | 1.20  | +* | +*/0 | 4.93  |
| Core encoded pilus                                   | <i>cep</i>  | VC1461 | 2.23  | +* | 0/0  | ND    |
| <b>Pathogenic regulation</b>                         |             |        |       |    |      |       |
| <i>toxR</i> activated gene A lipoprotein             | <i>tagA</i> | VC0820 | 0.35  | 0  | +*/0 | ND    |
| Toxin coregulated pilus biosynthesis protein P       | <i>tcpP</i> | VC0826 | 1.43  | +* | 0/0  | 1.98  |
| Toxin coregulated pilus biosynthesis protein H       | <i>tcpH</i> | VC0827 | 1.90  | +* | 0/0  | 2.76  |
| Toxin coregulated pilus biosynthesis protein S       | <i>tcpS</i> | VC0834 | 1.78  | +* | 0/0  | ND    |
| Toxin coregulated pilus biosynthesis protein T       | <i>tcpT</i> | VC0835 | 2.79  | +* | +*/0 | ND    |
| Toxin coregulated pilus virulence regulatory protein | <i>toxT</i> | VC0838 | 2.24  | +* | +*/0 | 22.47 |
| Cholera toxin transcriptional activator              | <i>toxR</i> | VC0984 | 2.72  | +* | +*/0 | 5.45  |
| Transmembrane regulatory protein                     | <i>toxS</i> | VC0983 | 1.69  | +* | 0/0  | 3.87  |
| PadR family transcriptional regulator                | <i>aphA</i> | VC2647 | 1.24  | +* | 0/+* | 1.46  |
| LysR family transcriptional regulator                | <i>aphB</i> | VC1049 | 1.03  | +* | 0/0  | 1.60  |
| DNA binding H-NS protein                             | <i>hns</i>  | VC1130 | -0.80 | -* | 0/0  | 0.32  |
| <b>Biofilm regulation</b>                            |             |        |       |    |      |       |
| Adenylate cyclase (EC 4.6.1.1)                       | <i>cya</i>  | VC0122 | 1.53  | +* | 0/0  | 3.06  |
| Catabolic repressor protein                          | <i>crp</i>  | VC2614 | 1.87  | +* | 0/0  | 2.31  |

|                                                        |               |         |       |    |      |      |
|--------------------------------------------------------|---------------|---------|-------|----|------|------|
| C-di-GMP phosphodiesterase                             |               | VC0658  | 2.87  | +* | 0/0  | 1.91 |
| Di-guanylate cyclase                                   |               | VCA0956 | -1.19 | -* | 0/0  | ND   |
| GGDEF                                                  |               | VCA0939 | -1.78 | -* | -*/0 | ND   |
| Sigma E factor regulatory protein                      | <i>rseC</i>   | VC2464  | -1.62 | -* | 0/0  | ND   |
| Sigma 54 dependent transcriptional regulator           |               | VC1817  | 1.75  | +* | 0/0  | ND   |
| Chitinase (EC 3.2.1.14)                                | <i>chiA</i>   | VCA0027 | -0.47 | 0  | -*/0 | 0.18 |
| Chitinase (EC 3.2.1.14)                                | <i>chiA-I</i> | VC1073  | -1.51 | -* | 0/0  | ND   |
| Transcriptional regulator                              | <i>vpsT</i>   | VCA0952 | -0.78 | -* | 0/0  | ND   |
| Polysaccharide biosynthesis glycosyltransferase        | <i>vpsL</i>   | VC0934  | -0.94 | -* | -*/0 | ND   |
| UDP-N-acetylglucosamine 2-epimerase (EC 5.1.3.14)      | <i>wecB</i>   | VC0917  | -1.00 | -* | 0/0  | 0.42 |
| UDP-N-acetylmannosamine dehydrogenase                  | <i>WecC</i>   | VC0918  | -0.20 | 0  | 0/0  | ND   |
| Serine acetyltransferase related protein (EC 2.3.1.30) | <i>cysE</i>   | VC0923  | -0.24 | 0  | 0/0  | ND   |

### Flagella

|                                                  |             |        |       |    |      |      |
|--------------------------------------------------|-------------|--------|-------|----|------|------|
| Flagellin C                                      | <i>flaC</i> | VC2187 | 1.02  | +* | +*/0 | 1.50 |
| Flagellar basal body P-ring biosynthesis protein | <i>flgA</i> | VC2203 | 0.67  | +* | 0/0  | ND   |
| Negative regulator of flagellin biosynthesis     | <i>flgM</i> | VC2204 | -0.72 | -* | 0/0  | ND   |
| Flagellum specific ATP synthase (EC:3.6.3.14)    | <i>fliI</i> | VC2130 | 1.38  | +* | 0/0  | 1.46 |
| Flagellar biosynthesis sigma factor              | <i>fliA</i> | VC2066 | 0.46  | 0  | 0/0  | ND   |

### Iron transport

|                                  |             |        |      |    |      |    |
|----------------------------------|-------------|--------|------|----|------|----|
| Ferrous iron transport protein B | <i>feoB</i> | VC2077 | 1.02 | +* | 0/0  | ND |
| Ferrous iron transport protein A | <i>feoA</i> | VC2078 | 0.60 | 0  | 0/+* | ND |

|                                 |             |         |      |    |      |      |
|---------------------------------|-------------|---------|------|----|------|------|
| Hemin ABC transporter           | <i>hutB</i> | VCA0913 | 1.07 | +* | 0/0  | ND   |
| Hemin ABC transporter           | <i>hutC</i> | VCA0914 | 1.43 | +* | 0/0  | ND   |
| Ferric vibriobactin transporter | <i>viuP</i> | VC0776  | 3.15 | +* | +*/0 | ND   |
| Ferric vibriobactin transporter | <i>viuD</i> | VC0777  | 0.76 | +* | +*/0 | ND   |
| Ferric vibriobactin transporter | <i>viuG</i> | VC0778  | 1.53 | +* | +*/0 | ND   |
| Ferric vibriobactin transporter | <i>viuH</i> | VC0779  | 1.35 | +* | +*/0 | ND   |
| Iron (III) ABC transporter      | <i>fbpA</i> | VCA0685 | 5.41 | +* | 0/+* | ND   |
| Iron (III) ABC transporter      | <i>fbpB</i> | VCA0686 | 6.92 | +* | +*/0 | 4.40 |
| Iron (III) ABC transporter      | <i>fbpC</i> | VCA0687 | 2.27 | +* | 0/0  | ND   |

### Chemotaxis

|                                      |             |        |      |    |      |      |
|--------------------------------------|-------------|--------|------|----|------|------|
| Chemotaxis protein methyltransferase | <i>cheR</i> | VC1399 | 4.38 | +* | 0/0  | 9.77 |
| Chemotaxis protein                   | <i>cheA</i> | VC1400 | 1.73 | +* | 0/0  | ND   |
| Chemotaxis protein methylesterase    | <i>cheB</i> | VC1401 | 2.51 | +* | 0/0  | 2.48 |
| Purine binding chemotaxis protein    | <i>cheW</i> | VC1402 | 0.16 | 0  | 0/0  | ND   |
| Methyl accepting chemotaxis protein  |             | VC1535 | 0.96 | +* | 0/0  | ND   |
| Methyl accepting chemotaxis protein  |             | VC1248 | 1.43 | +* | +*/0 | ND   |
| Methyl accepting chemotaxis protein  |             | VC1298 | 2.11 | +* | 0/0  | ND   |
| Methyl accepting chemotaxis protein  |             | VC1394 | 3.70 | +* | 0/+* | ND   |
| Methyl accepting chemotaxis protein  |             | VC1403 | 0.55 | 0  | 0/+* | ND   |
| Methyl accepting chemotaxis protein  |             | VC1643 | 3.17 | +* | +*/0 | ND   |

### Bile resistance

|                                               |              |         |      |    |      |      |
|-----------------------------------------------|--------------|---------|------|----|------|------|
| Bile resistance protein                       |              | VCA1008 | 0.91 | +* | 0/0  | ND   |
| Terrulite resistance protein                  |              | VC0813  | 1.66 | +* | 0/+* | ND   |
| Bile resistance protein                       |              | VCA0877 | 2.15 | +* | 0/0  | 2.75 |
| <b>Biotin synthesis</b>                       |              |         |      |    |      |      |
| Biotin biosynthesis protein B (EC 2.8.1.6)    | <i>bioB</i>  | VC1112  | 1.80 | +* | 0/0  | 2.19 |
| Biotin biosynthesis protein C (EC 2.1.1.197)  | <i>bioC</i>  | VC1114  | 2.44 | +* | +*/0 | ND   |
| Biotin biosynthesis protein D (EC 6.3.3.3)    | <i>bioD</i>  | VC1115  | 1.25 | +* | +*/0 | ND   |
| <b><i>In vivo</i> inducible genes</b>         |              |         |      |    |      |      |
| Anthranilate synthase (EC 4.1.3.27)           | <i>tprG</i>  | VC1173  | 4.07 | +* | 0/0  | 6.72 |
| Aconitate hydratase (EC 4.2.1.3)              | <i>acnA</i>  | VC1338  | 3.43 | +* | 0/0  | 3.84 |
| Glutamate synthase (EC 1.4.1.13)              | <i>gltB1</i> | VC2373  | 2.85 | +* | 0/0  | 4.13 |
| Phosphoenolpyruvate carboxylase (EC 4.1.1.31) | <i>ppc</i>   | VC2646  | 0.51 | 0  | 0/0  | ND   |
| Adenylyltransferase (EC 2.7.7.73)             | <i>thiF</i>  | VC0063  | 1.61 | +* | 0/0  | ND   |
| Serine transporter                            | <i>sdaC2</i> | VC1658  | 0.93 | +* | 0/0  | ND   |
| Cation/acetate symporter                      | <i>actP</i>  | VC2705  | 7.48 | +* | +*/0 | 5.90 |
| Histidine sensor kinase                       |              | VC0622  | 2.24 | +* | 0/0  | ND   |
| Extra-cellular nuclease related protein       |              | VC2621  | 1.24 | +* | +*/0 | ND   |
| RNase BN                                      | <i>rbn</i>   | VC2742  | 0.34 | 0  | 0/0  | ND   |
| Recombinase protein                           | <i>xerD</i>  | VC2419  | 0.33 | 0  | 0/0  | ND   |
| Paraquat-inducible protein A                  | <i>pqiA</i>  | VC1500  | 0.79 | +* | 0/0  | ND   |
| Lysine decarboxylase (EC 4.1.1.18)            | <i>cadA</i>  | VC0281  | 1.39 | +* | +*/0 | 2.91 |

---



#, Gene ID is based on annotation of N16961 whole genome sequence; †, Fold change in microarray analysis (Gnt grown cells as compared to Glu grown cells) where - indicates decrease of transcript levels as compared to Glu grown cells; ‡, Fold change (increase or decrease) by 0.6 or more ( $\log_2$  expression ratio) have been considered for expression significance and +\* denotes increase significantly while -\* denotes decrease significantly; † Microarray based relative expression adopted from GSE24405-07 for a comparison; ‡Relative fold in transcript level of Gnt grown cells as compared to Glu grown cells and that was determined by real-time PCR; ND, not done
